# Supplementary material
Source: PubMed Central journal article supplement (PMC8108066)
Supplement: NIHMS1689725-supplement-Supplemental_table.pdf [file NIHMS1689725-supplement-Supplemental_table.pdf]

## SUPPLEMENTARY MATERIAL

Supplementary Table S1. Summary of patient demographics, skin toxicities, and management.

|                                                  |                   |
|--------------------------------------------------|-------------------|
| Total patients in trial (no.)                    | 17                |
| Female, no. (%)                                  | 14 (82)           |
| Male, no. (%)                                    | 3 (18)            |
| Female, median age (range)                       | 33 years (19-69)  |
| Male, median age (range)                         | 58 years (22-60)  |
| Trial follow-up time, median (range)             | >25 months (3-30) |
| Total patients with adverse skin events, no. (%) | 12/17 (71)        |
| Follicular and cystic lesions, no. (%)           | 9/12 (75)         |
| Pruritic eruption, no. (%)                       | 6/12 (50)         |
| Topical and/or systemic antibiotics, no. (%)     | 9/12 (75)         |
| Local surgical intervention, no. (%)             | 5/12 (42)         |
| Patients sent for Dermatology consult, no. (%)   | 7/12 (58)         |
| Number of consults, median (range)               | 3 (1-5)           |
| Follicular and cystic lesions, no.               | 6                 |
| Axilla, no.                                      | 4                 |
| Inguinal crease, no.                             | 3                 |
| Labia, no.                                       | 3                 |
| Buttocks, no.                                    | 2                 |
| Medial thigh, no.                                | 2                 |
| Granuloma annulare, no.                          | 2                 |
| Urticarial plaques                               | 1                 |
